# Supplementary material for: Preparation of MCM-48 materials with enhanced hydrothermal stability
Source: Royal Society of Chemistry journal article supplement (doi:10.1039/b607599a), 2006-01-01

## Preparation of MCM-48 Materials with Enhanced Hydrothermal Stability

Kaixue Wang,<sup>a</sup> Yingjie Lin,<sup>b</sup> Michael A. Morris<sup>a</sup> and Justin D. Holmes<sup>a\*</sup>

<sup>a</sup>*Department of Chemistry, Materials Section and Supercritical Fluid Centre,  
University College Cork, Cork, Ireland*

<sup>b</sup>*College of Chemistry, Jilin University, Changchun, P. R. China*

### Supplementary information:

**Figure S1.** XRD patterns of sc-CO<sub>2</sub>/Ti treated samples before and after the hydrothermal treatment in boiling water, showing no obvious enhancement in hydrothermal stability.

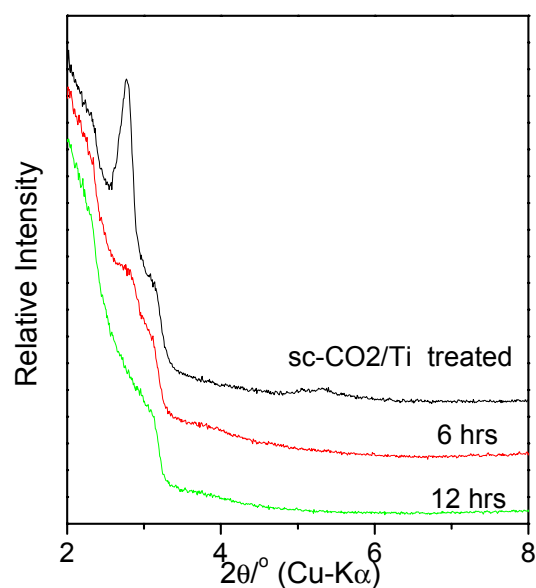

**Figure S2.** XRD patterns of sc-CO<sub>2</sub>/Zr treated samples before and after the hydrothermal treatment in boiling water, showing their poor hydrothermal stability as the pure silica MCM-48.

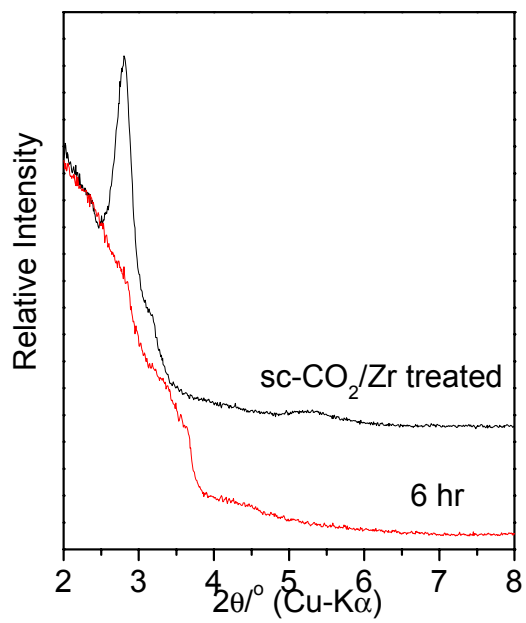

Supplement: b607599a.pdf [file b607599a.pdf]
